# Supplementary material
Source: PubMed Central journal article supplement (PMC2605277)
Supplement: NIHMS81625-supplement-supp_data.pdf [file NIHMS81625-supplement-supp_data.pdf]

# **Chemical control of protein stability and function in living animals**

## **Supplemental Information**

Laura A. Banaszynski<sup>1</sup>, Mark A. Sellmyer<sup>2,3</sup>, Christopher H. Contag<sup>3</sup>,  
Thomas J. Wandless<sup>2</sup>, and Steve H. Thorne<sup>3\*</sup>

<sup>1</sup>Department of Chemistry, <sup>2</sup>Department of Chemical & Systems Biology,  
and <sup>3</sup>Departments of Pediatrics, Radiology, Microbiology & Immunology,  
Stanford University, 318 Campus Drive, Stanford, CA 94305, USA.

\*Current Address: University of Pittsburgh Cancer Institute and Department of Surgery,  
University of Pittsburgh, Pittsburgh, PA 15232 USA

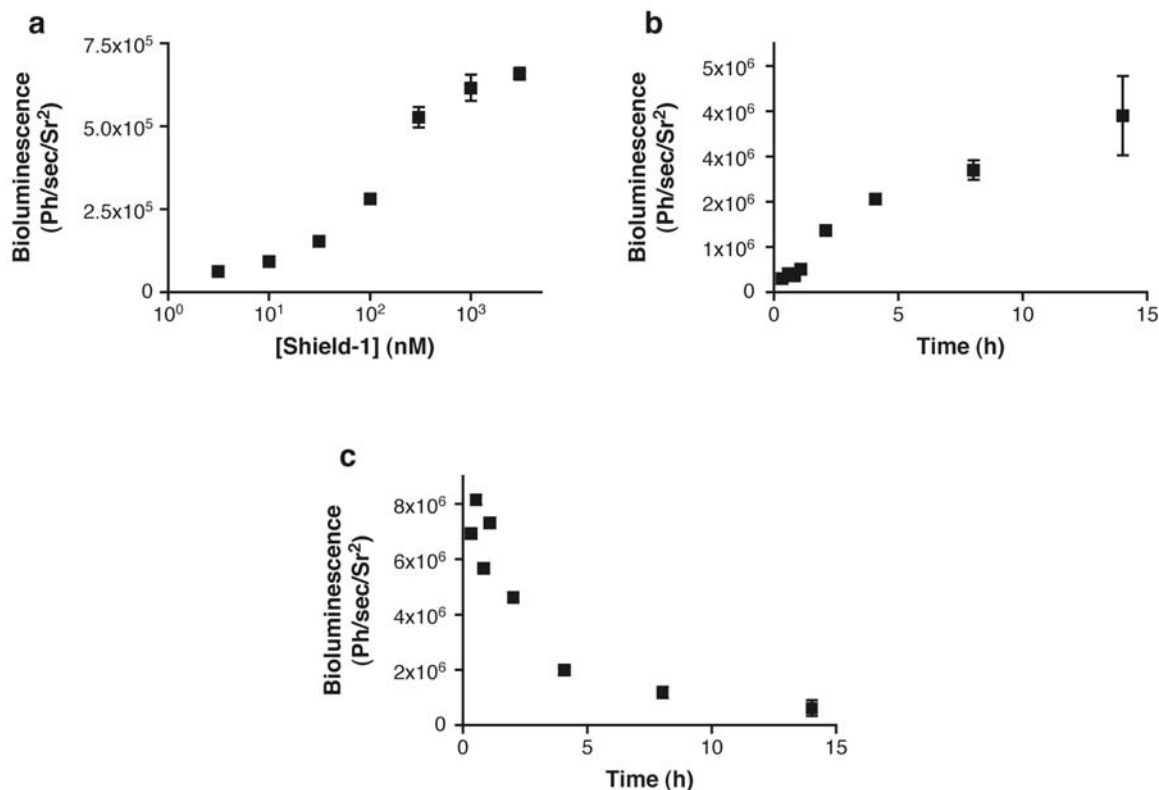

**Figure S1.** Analysis of L106P-tsLuc in cultured cells. **(a)** HCT116 cells stably expressing L106P-tsLuc were treated with varying concentrations of Shield-1 (3 μM to 3 nM) and monitored for luminescence. Data are represented as the average luminescence  $\pm$  SEM (n=4). **(b)** HCT116 cells stably expressing L106P-tsLuc were treated with 1 μM Shield-1, and increases in luminescence were monitored over time. **(c)** HCT116 cells stably expressing L106P-tsLuc were treated with 1 μM Shield-1 for 24 hrs at which point cells were washed with media to remove Shield-1, and decreases in luminescence were monitored over time. Data for panels b and c are represented as the average luminescence  $\pm$  SEM (n=3).

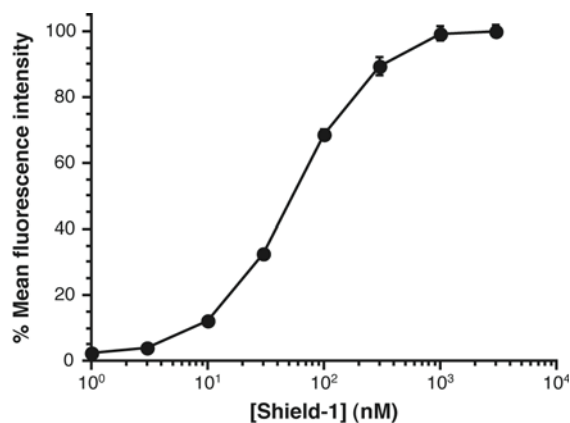

**Figure S2.** HCT116 cells stably expressing an L106P-tomato fusion were titrated with three-fold dilutions of Shield-1 (3  $\mu$ M to 1 nM) and monitored by flow cytometry. Data are presented as the average mean fluorescence intensity  $\pm$  SEM relative to that of the maximum fluorescence intensity observed (n=3).

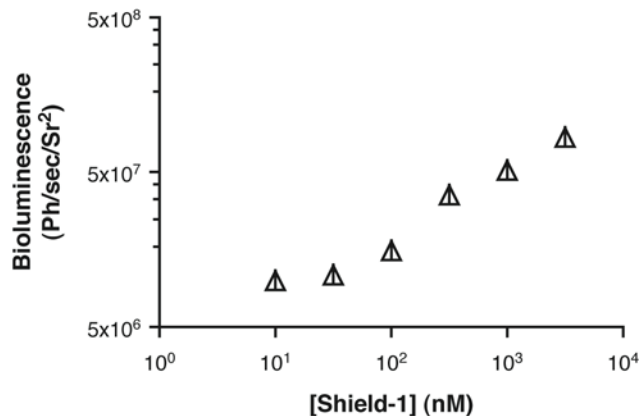

**Figure S3.** Conditional regulation of a secreted protein. HCT116 cells stably expressing a fusion of the L106P destabilizing domain to *Gaussia* luciferase were treated with various concentrations of Shield-1 (3  $\mu$ M to 10 nM) and assayed for luminescence in the cell culture media. Data are represented as the average luminescence  $\pm$  SEM (n=3).

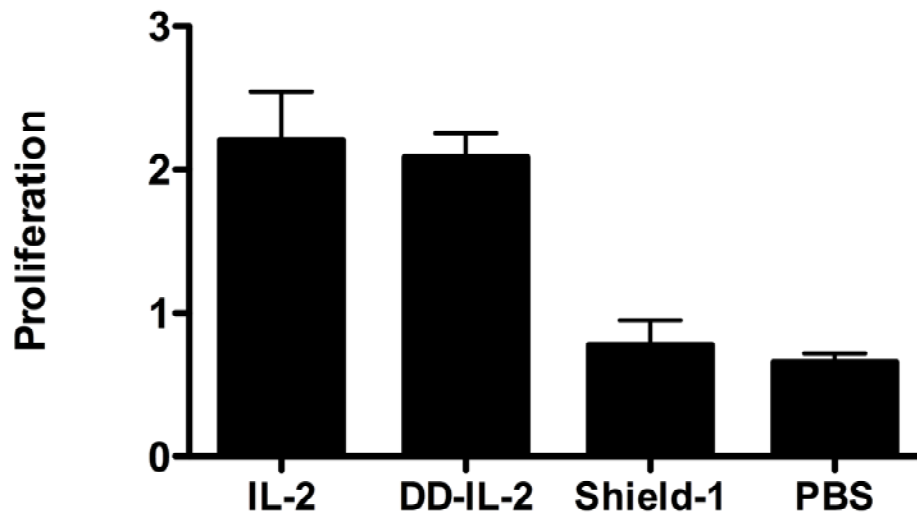

**Figure S4.** Functional activity of IL-2 fused to L106P. HCT116 cells expressing IL-2 fused to the destabilizing domain L106P (DD-IL-2) were treated with Shield-1 (1 $\mu$ M) for 24 hr, at which point the culture media was collected and filtered. Levels of DD-IL-2 in the media were quantified by ELISA. DD-IL-2 was then added to NK-92 cells, a human NK cell line dependent on IL-2 for growth. Cells were alternatively treated with equivalent levels (as determined by ELISA) of recombinant human IL-2, Shield-1 (1 $\mu$ M), or PBS alone. Cell numbers were determined after 48 hr and proliferation determined relative to the number of cells at the start of the assay ( $n=3 \pm$  SEM).

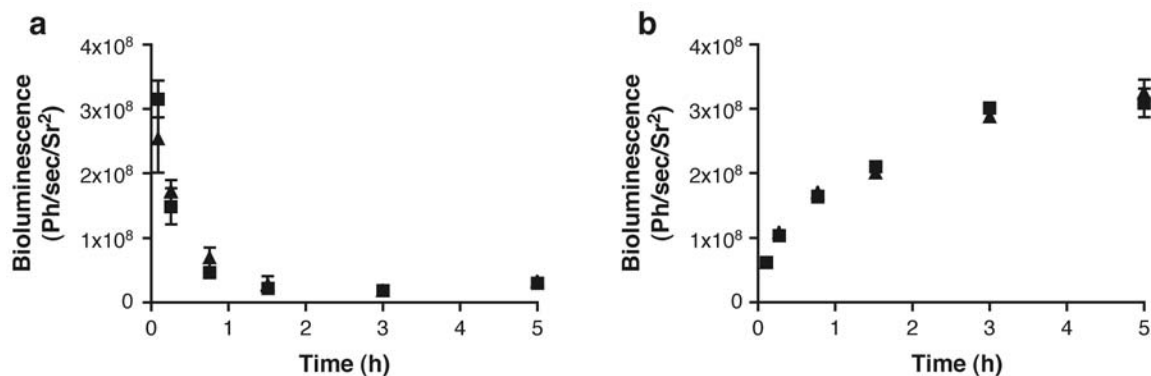

**Figure S5.** Viral infection does not interfere with L106P-mediated degradation. **(a)** HepG2 cells stably expressing L106P fused to the N-terminus of luciferase (L106P-Luc) were either untreated (triangles) or infected (squares) with a wild-type vaccinia virus for 1 hr at 37 °C. Cells were washed to remove excess virus and then treated with 1  $\mu$ M Shield-1. Cells were monitored for luminescence over time. **(b)** HepG2 cells stably expressing L106P-luc were infected with an empty vvDD vaccinia virus as above. Cells were then treated with 1  $\mu$ M Shield-1 for 24 hr, at which point cells were washed with media to remove Shield-1, and luminescence was monitored over time. Data for both panels are represented as the average luminescence  $\pm$  SEM (n=3).

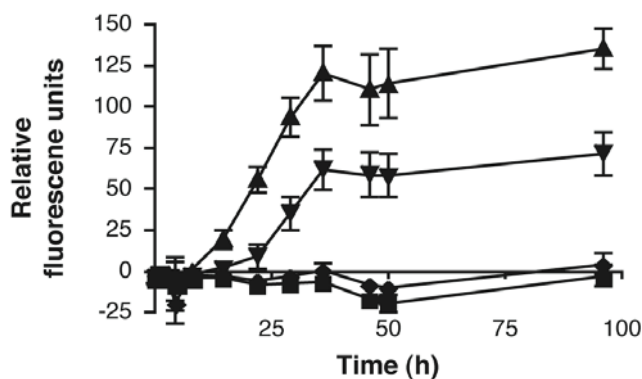

**Figure S6.** Conditional stability of a virally delivered reporter protein in cultured cells. HCT116 cells were infected with the vvDD L106P-tomato vaccinia strain. Cells were then mock treated (squares) or treated with Shield-1 at 1  $\mu$ M (triangles), 100 nM (inverted triangles), or 10 nM (diamonds). Cells were monitored for fluorescence over time, and background-subtracted data are represented as the average fluorescence  $\pm$  SEM (n=3).

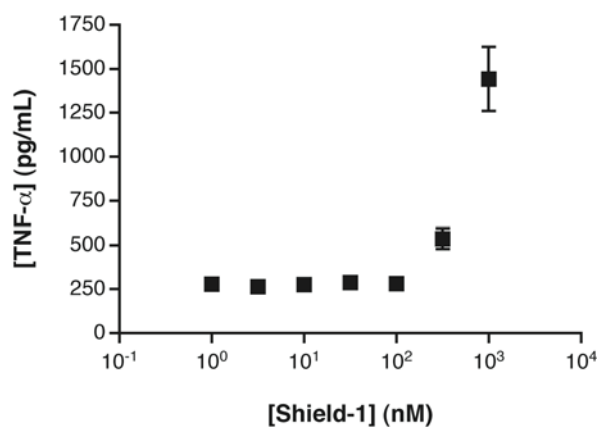

**Figure S7.** Conditional regulation of TNF- $\alpha$  secretion in cultured cells. HCT116 cells were infected with vaccinia virus strain vvDD expressing L-L106P-TNF- $\alpha$  and then treated with various concentrations of Shield-1 (1  $\mu$ M to 1 nM). The concentration of TNF- $\alpha$  in the cell culture media was determined by ELISA. Data are represented as the average TNF- $\alpha$  concentration  $\pm$  SEM (n=3).
